# Supplementary material for: T-cell receptor-driven lymphomagenesis in mice derived from a reprogrammed T cell
Source: HighWire-hosted journal article supplement (doi:10.1073/pnas.1013230107), 2010-10-18
Supplement: pnas.201013230SI.pdf [file pnas.201013230SI.pdf]

# Supporting Information

Serwold et al. 10.1073/pnas.1013230107

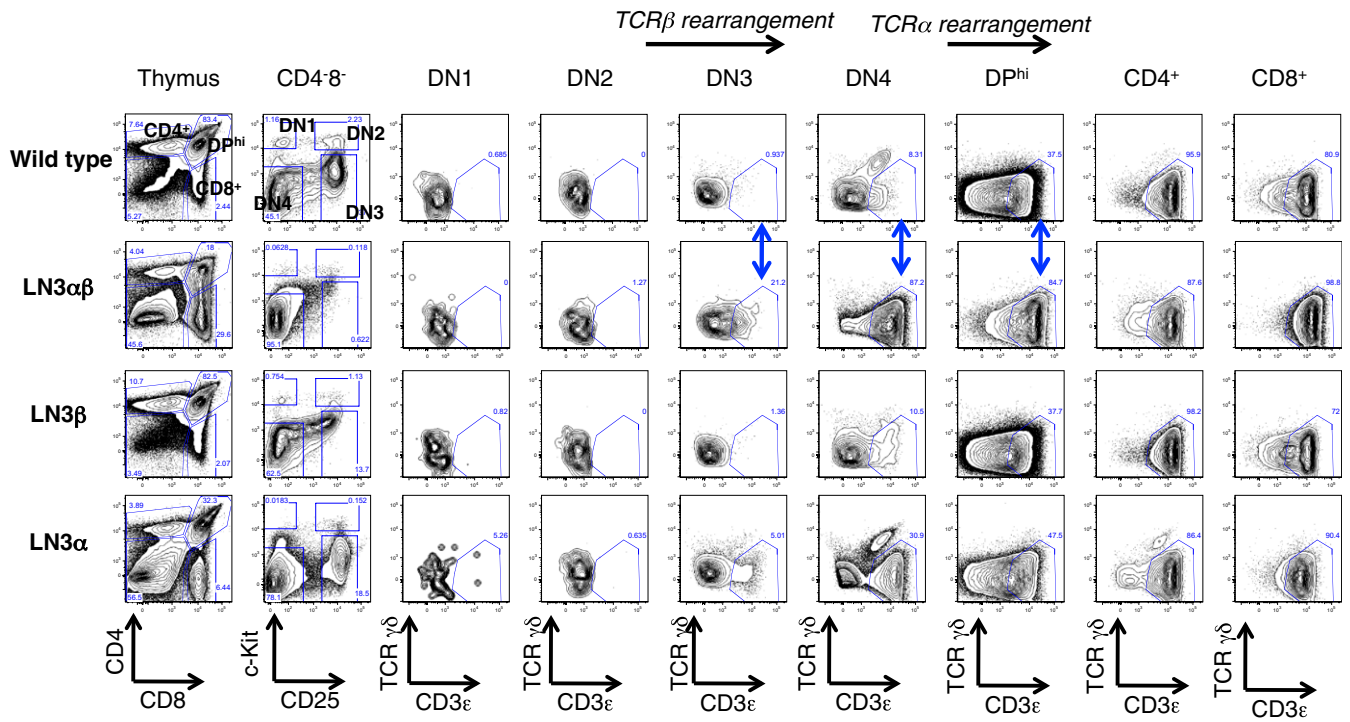

**Fig. S1.** LN3  $\alpha\beta$  mice express surface TCR abnormally early during T-cell development. Thymuses of mice with the genotypes indicated on the left were stained for CD3 $\epsilon$  as well as other markers of T-cell development and analyzed by flow cytometry. Live, lymphocyte gated events are shown in the first column, CD4- and CD8-negative cells are shown in the second column, and the subgated thymocyte stages are further analyzed, and the right for CD3 $\epsilon$  and TCR  $\gamma\delta$  expression. CD3 $\epsilon$  expression requires coexpression of rearranged TCR chains and is indicative of a complete TCR. Blue arrows point out the CD3 $\epsilon$  expression in the DN3, DN4, and DP<sup>hi</sup> stages, all of which show early expression in LN3 $\alpha\beta$  mice. Results are representative of at least five mice per genotype.
